# Supplementary material
Source: Springer Nature journal article supplement (https://www.springermedizin.de/resource/supplementary/12974_2011_428_MOESM2_ESM.pdf/9601274)

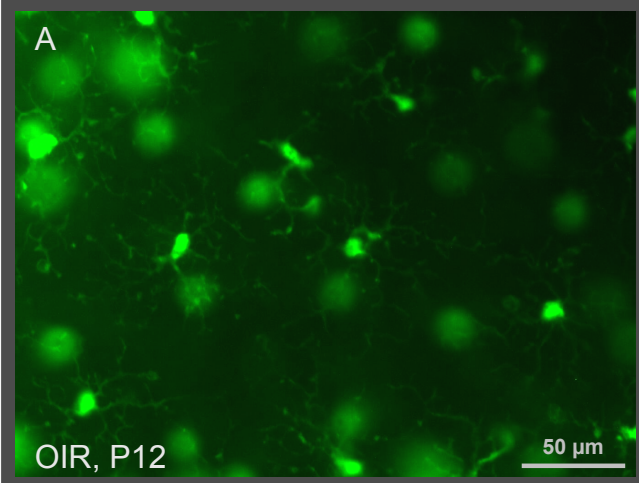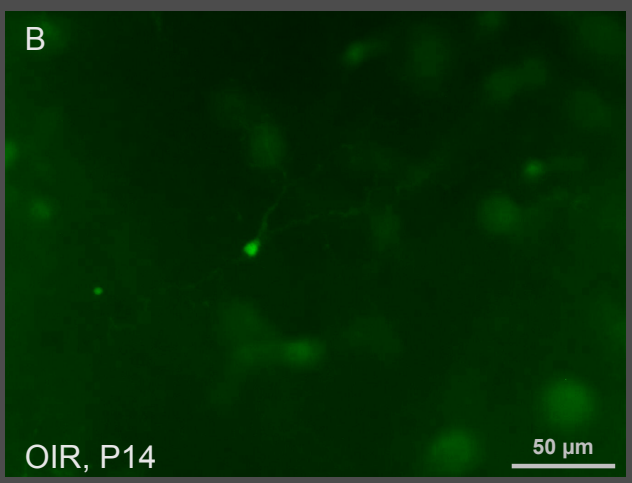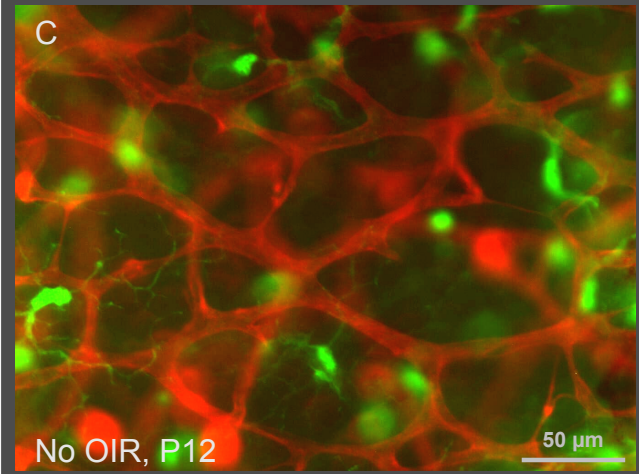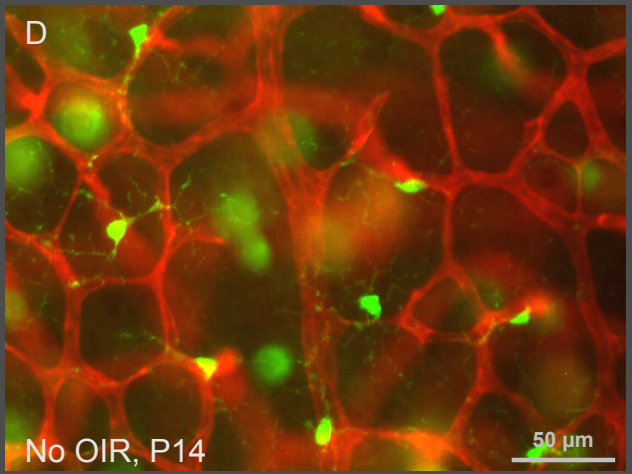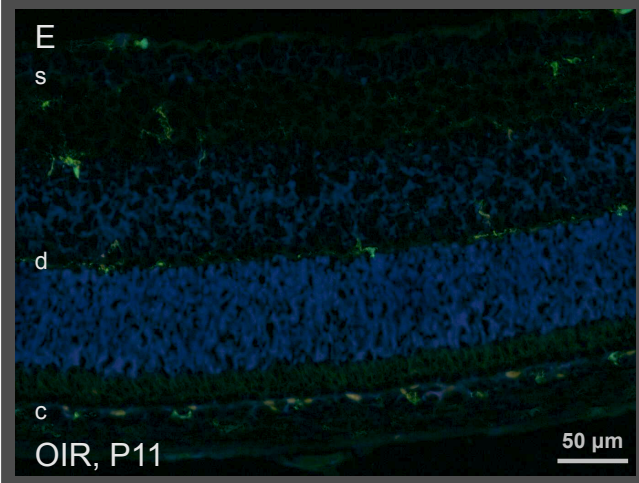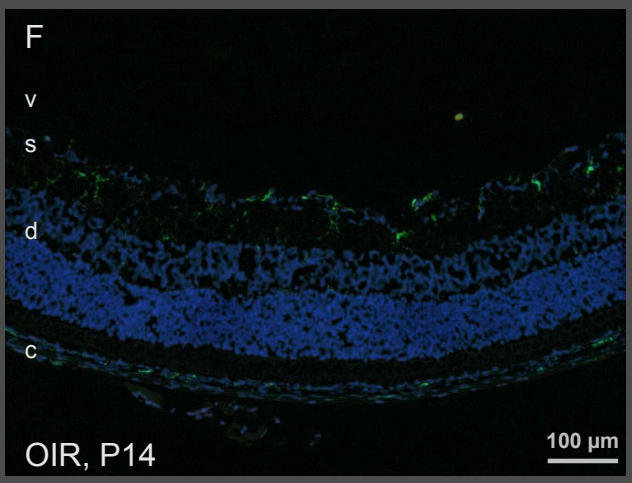

Supplement: MOESM2 [file 9601274]
